# Supplementary material
Source: MDPI journal article supplement (https://www.mdpi.com/1424-2818/15/3/353)
Supplement: s1 [file s1]

Invading the Greek Seas: spatiotemporal patterns of marine impactful alien and cryptogenic species

Michail Ragkousis<sup>1</sup>, Maria Sini<sup>1\*</sup>, Nikoletta Koukouroufli<sup>1</sup>, Argyro Zenetos<sup>2</sup>, Stelios Katsanevakis<sup>1</sup>

<sup>1</sup> Department of Marine Sciences, University of the Aegean, University Hill, 81100 Mytilene, Greece;

<sup>2</sup> Institute of Marine Biological Resources and Inland Waters, Hellenic Centre for Marine Research, 19013 Attika, Greece;

\* Correspondence: mariasini@marine.aegean.gr

Supplementary Material

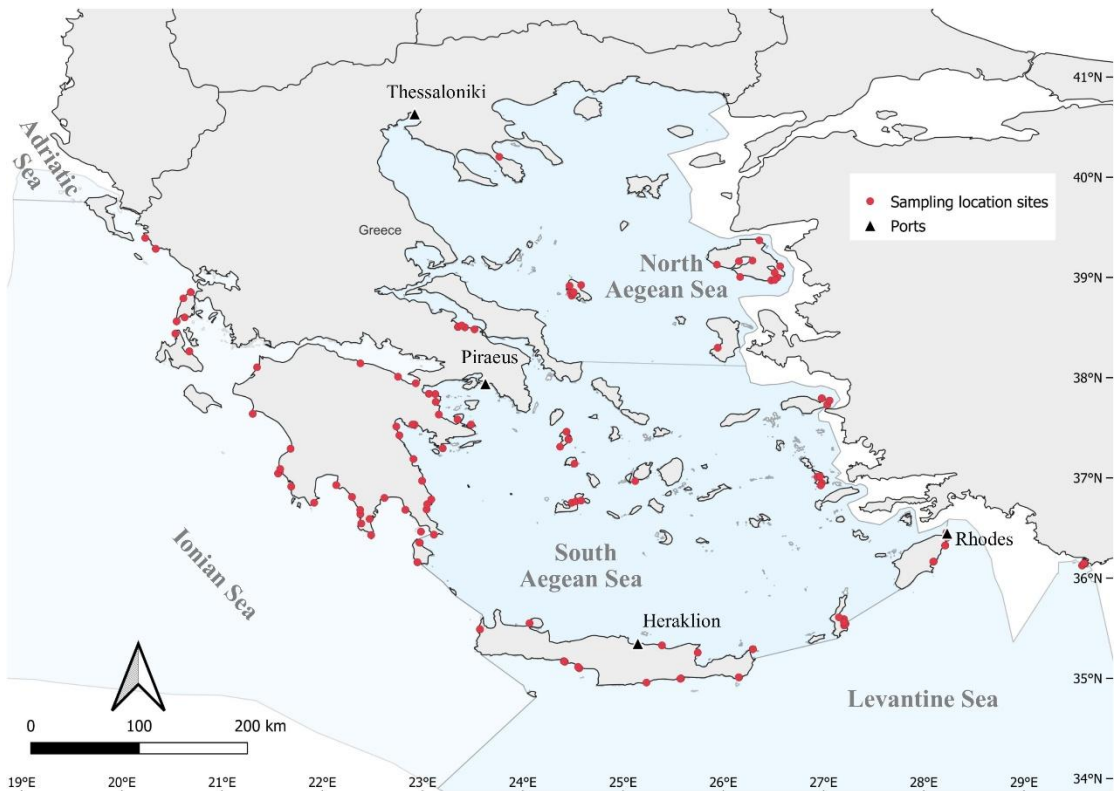

**Figure S1.** Map of the study area, depicting all the main marine ecoregions considered according to the Marine Reporting Units (MRUs) of the Marine Strategy Framework Directive (MSFD): the Aegean Sea, the Levantine Sea, the Ionian Sea, and a small part of the Adriatic Sea. Points represent stations that were assessed *in-situ* through underwater scientific surveys.

**Table S1.** List of stations covered during scientific surveys, along with their geographic location, geographic coordinates and habitat type, which were assessed *in-situ* through underwater scientific surveys.

| AA | Marine region | Marine area       | x      | y      | Habitat type                                |
|----|---------------|-------------------|--------|--------|---------------------------------------------|
| 1  | Ionian        | Korinthiakos Gulf | 22.380 | 38.143 | Hard substrates (both rocky and artificial) |
| 2  | Ionian        | Lakonikos Gulf    | 22.620 | 36.800 | Hard substrates (both rocky and artificial) |
| 3  | S Aegean      | Argolikos Gulf    | 22.909 | 37.188 | Hard substrates (both rocky and artificial) |
| 4  | S Aegean      | Peloponnese E     | 22.995 | 36.971 | Hard substrates (both rocky and artificial) |

| AA | Marine region | Marine area       | x      | y      | Habitat type                                |
|----|---------------|-------------------|--------|--------|---------------------------------------------|
| 5  | S Aegean      | Peloponnese E     | 23.087 | 36.785 | Hard substrates (both rocky and artificial) |
| 6  | S Aegean      | Peloponnese E     | 23.113 | 36.434 | Hard substrates (both rocky and artificial) |
| 7  | Ionian        | Peloponnese W     | 21.575 | 37.061 | Artificial substrates                       |
| 8  | Ionian        | Korinthiakos Gulf | 22.755 | 38.009 | Artificial substrates                       |
| 9  | Ionian        | Korinthiakos Gulf | 22.932 | 37.945 | Artificial substrates                       |
| 10 | N Aegean      | Evoikos Gulf      | 23.518 | 38.482 | Artificial substrates                       |
| 11 | Levantine     | Crete             | 24.412 | 35.171 | Artificial substrates                       |
| 12 | S Aegean      | Cyclades IsIs     | 26.983 | 36.949 | Artificial substrates                       |
| 13 | Ionian        | Thespotia         | 20.233 | 39.395 | Rocky substrates                            |
| 14 | Ionian        | Peloponnese W     | 20.338 | 39.286 | Rocky substrates                            |
| 15 | Ionian        | Ionian IsIs       | 20.534 | 38.439 | Rocky substrates                            |
| 16 | Ionian        | Ionian IsIs       | 20.547 | 38.562 | Rocky substrates                            |
| 17 | Ionian        | Ionian IsIs       | 20.614 | 38.792 | Rocky substrates                            |
| 18 | Ionian        | Ionian IsIs       | 20.673 | 38.263 | Rocky substrates                            |
| 19 | Ionian        | Ionian IsIs       | 20.674 | 38.262 | Rocky substrates                            |
| 20 | Ionian        | Ionian IsIs       | 20.687 | 38.854 | Rocky substrates                            |
| 21 | Ionian        | Ionian IsIs       | 20.688 | 38.853 | Rocky substrates                            |
| 22 | Ionian        | Kyparisiakos Gulf | 21.306 | 37.639 | Rocky substrates                            |
| 23 | Ionian        | Peloponnese W     | 21.558 | 37.045 | Rocky substrates                            |
| 24 | Ionian        | Peloponnese W     | 21.559 | 37.044 | Rocky substrates                            |
| 25 | Ionian        | Kyparisiakos Gulf | 21.580 | 37.089 | Rocky substrates                            |
| 26 | Ionian        | Peloponnese E     | 21.690 | 36.914 | Rocky substrates                            |
| 27 | Ionian        | Messiniakos       | 21.919 | 36.752 | Rocky substrates                            |
| 28 | Ionian        | Messiniakos       | 22.139 | 36.929 | Rocky substrates                            |
| 29 | Ionian        | Kyparisiakos Gulf | 22.296 | 36.810 | Rocky substrates                            |
| 30 | Ionian        | Lakonikos Gulf    | 22.487 | 36.429 | Rocky substrates                            |
| 31 | Ionian        | Peloponnese W     | 22.829 | 36.681 | Rocky substrates                            |
| 32 | Ionian        | Ionian IsIs       | 22.949 | 36.159 | Rocky substrates                            |
| 33 | S Aegean      | Ionian IsIs       | 22.972 | 36.353 | Rocky substrates                            |
| 34 | S Aegean      | Peloponnese E     | 22.983 | 36.464 | Rocky substrates                            |
| 35 | Ionian        | Peloponnese W     | 23.046 | 36.737 | Rocky substrates                            |
| 36 | N Aegean      | Evoikos Gulf      | 23.354 | 38.509 | Rocky substrates                            |
| 37 | N Aegean      | Evoikos Gulf      | 23.391 | 38.522 | Rocky substrates                            |
| 38 | N Aegean      | Evoikos Gulf      | 23.423 | 38.503 | Rocky substrates                            |
| 39 | Ionian        | Crete             | 23.573 | 35.488 | Rocky substrates                            |
| 40 | S Aegean      | Cretan Sea        | 24.067 | 35.550 | Rocky substrates                            |
| 41 | Levantine     | Crete             | 24.410 | 35.171 | Rocky substrates                            |
| 42 | S Aegean      | Cretan Sea        | 24.419 | 35.165 | Rocky substrates                            |
| 43 | S Aegean      | Cyclades IsIs     | 24.436 | 37.460 | Rocky substrates                            |
| 44 | S Aegean      | Cyclades IsIs     | 24.458 | 37.384 | Rocky substrates                            |
| 45 | N Aegean      | N Sporades IsIs   | 24.466 | 38.917 | Rocky substrates                            |
| 46 | S Aegean      | Cyclades IsIs     | 24.488 | 36.753 | Rocky substrates                            |
| 47 | N Aegean      | N Sporades IsIs   | 24.507 | 38.853 | Rocky substrates                            |

| AA | Marine region | Marine area       | x      | y      | Habitat type              |
|----|---------------|-------------------|--------|--------|---------------------------|
| 48 | Levantine     | Crete             | 24.551 | 35.114 | Rocky substrates          |
| 49 | N Aegean      | N Sporades IsIs   | 24.582 | 38.924 | Rocky substrates          |
| 50 | S Aegean      | Cretan Sea        | 25.388 | 35.329 | Rocky substrates          |
| 51 | Levantine     | Crete             | 25.572 | 34.996 | Rocky substrates          |
| 52 | S Aegean      | Cretan Sea        | 25.745 | 35.257 | Rocky substrates          |
| 53 | N Aegean      | NE Aegean IsIs    | 25.944 | 38.299 | Rocky substrates          |
| 54 | Levantine     | Crete             | 26.154 | 35.011 | Rocky substrates          |
| 55 | Levantine     | Crete             | 26.156 | 35.010 | Rocky substrates          |
| 56 | N Aegean      | NE Aegean IsIs    | 26.168 | 39.005 | Rocky substrates          |
| 57 | N Aegean      | NE Aegean IsIs    | 26.291 | 39.169 | Rocky substrates          |
| 58 | S Aegean      | Cretan Sea        | 26.294 | 35.291 | Rocky substrates          |
| 59 | S Aegean      | Cretan Sea        | 26.295 | 35.291 | Rocky substrates          |
| 60 | N Aegean      | NE Aegean IsIs    | 26.359 | 39.370 | Rocky substrates          |
| 61 | N Aegean      | NE Aegean IsIs    | 26.478 | 38.971 | Rocky substrates          |
| 62 | N Aegean      | NE Aegean IsIs    | 26.513 | 38.975 | Rocky substrates          |
| 63 | N Aegean      | NE Aegean IsIs    | 26.567 | 39.112 | Rocky substrates          |
| 64 | N Aegean      | NE Aegean IsIs    | 26.610 | 39.011 | Rocky substrates          |
| 65 | S Aegean      | Dodecanese IsIs   | 26.940 | 37.010 | Rocky substrates          |
| 66 | N Aegean      | NE Aegean IsIs    | 26.982 | 37.795 | Rocky substrates          |
| 67 | Levantine     | Dodecanese IsIs   | 27.213 | 35.537 | Rocky substrates          |
| 68 | Levantine     | Dodecanese IsIs   | 27.216 | 35.551 | Rocky substrates          |
| 69 | Levantine     | Dodecanese IsIs   | 28.098 | 36.165 | Rocky substrates          |
| 70 | Levantine     | Dodecanese IsIs   | 28.213 | 36.325 | Rocky substrates          |
| 71 | Levantine     | Dodecanese IsIs   | 29.579 | 36.126 | Rocky substrates          |
| 72 | Levantine     | Dodecanese IsIs   | 29.604 | 36.147 | Rocky substrates          |
| 73 | Ionian        | Peloponnese W     | 22.389 | 36.545 | Rocky substrates, caverns |
| 74 | Ionian        | Lakonikos Gulf    | 22.472 | 36.590 | Rocky substrates, caverns |
| 75 | S Aegean      | Cyclades IsIs     | 25.121 | 36.969 | Marine caves              |
| 76 | S Aegean      | Cyclades IsIs     | 26.972 | 36.926 | Marine caves              |
| 77 | N Aegean      | NE Aegean IsIs    | 27.060 | 37.772 | Marine caves              |
| 78 | Levantine     | Dodecanese IsIs   | 27.204 | 35.559 | Marine caves              |
| 79 | Levantine     | Dodecanese IsIs   | 27.205 | 35.559 | Marine caves              |
| 80 | Levantine     | Dodecanese IsIs   | 27.210 | 35.557 | Marine caves              |
| 81 | Levantine     | Dodecanese IsIs   | 27.213 | 35.537 | Marine caves              |
| 82 | Levantine     | Dodecanese IsIs   | 28.215 | 36.326 | Marine caves              |
| 83 | Levantine     | Dodecanese IsIs   | 29.579 | 36.126 | Marine caves              |
| 84 | N Aegean      | N Sporades IsIs   | 24.487 | 38.818 | Marine caves              |
| 85 | S Aegean      | Cyclades IsIs     | 24.581 | 36.774 | Marine caves              |
| 86 | Ionian        | Ionian IsIs       | 20.536 | 38.439 | Mixed substrates          |
| 87 | Ionian        | Ionian IsIs       | 20.627 | 38.602 | Mixed substrates          |
| 88 | Ionian        | Peloponnese W     | 21.348 | 38.104 | Mixed substrates          |
| 89 | Ionian        | Peloponnese W     | 21.684 | 37.291 | Mixed substrates          |
| 90 | Ionian        | Korinthiakos Gulf | 22.314 | 38.172 | Mixed substrates          |

| AA  | Marine region | Marine area     | x      | y      | Habitat type      |
|-----|---------------|-----------------|--------|--------|-------------------|
| 91  | Ionian        | Mani            | 22.379 | 36.639 | Mixed substrates  |
| 92  | Ionian        | Argolikos Gulf  | 22.738 | 37.513 | Mixed substrates  |
| 93  | Ionian        | Argolikos Gulf  | 22.769 | 37.425 | Mixed substrates  |
| 94  | S Aegean      | Saronikos Gulf  | 22.899 | 37.533 | Mixed substrates  |
| 95  | S Aegean      | Argolikos Gulf  | 22.921 | 37.532 | Mixed substrates  |
| 96  | Ionian        | Ionian Isls     | 22.968 | 36.354 | Mixed substrates  |
| 97  | S Aegean      | Peloponnese E   | 23.040 | 36.686 | Mixed substrates  |
| 98  | S Aegean      | Saronikos Gulf  | 23.063 | 37.840 | Mixed substrates  |
| 99  | Ionian        | Saronikos Gulf  | 23.127 | 37.837 | Mixed substrates  |
| 100 | S Aegean      | Saronikos Gulf  | 23.132 | 37.759 | Mixed substrates  |
| 101 | Ionian        | Saronikos Gulf  | 23.163 | 37.632 | Mixed substrates  |
| 102 | Ionian        | Argolikos Gulf  | 23.201 | 37.296 | Mixed substrates  |
| 103 | S Aegean      | Saronikos Gulf  | 23.348 | 37.583 | Mixed substrates  |
| 104 | N Aegean      | Evoikos Gulf    | 23.353 | 38.505 | Mixed substrates  |
| 105 | S Aegean      | Saronikos Gulf  | 23.484 | 37.532 | Mixed substrates  |
| 106 | Ionian        | Crete           | 23.573 | 35.491 | Mixed substrates  |
| 107 | Levantine     | Crete           | 24.412 | 35.171 | Mixed substrates  |
| 108 | N Aegean      | N Sporades Isls | 24.476 | 38.850 | Mixed substrates  |
| 109 | Levantine     | Crete           | 26.154 | 35.011 | Mixed substrates  |
| 110 | N Aegean      | NE Aegean Isls  | 26.478 | 38.971 | Mixed substrates  |
| 111 | N Aegean      | NE Aegean Isls  | 26.512 | 39.048 | Mixed substrates  |
| 112 | Levantine     | Dodecanese Isls | 28.225 | 36.454 | Mixed substrates  |
| 113 | Levantine     | Dodecanese Isls | 29.598 | 36.149 | Mixed substrates  |
| 114 | Levantine     | Dodecanese Isls | 29.604 | 36.147 | Mixed substrates  |
| 115 | Ionian        | Ionian Isls     | 20.674 | 38.262 | Mobile substrates |
| 116 | Ionian        | Ionian Isls     | 22.949 | 36.159 | Mobile substrates |
| 117 | N Aegean      | Chalkidiki      | 23.766 | 40.203 | Mobile substrates |
| 118 | N Aegean      | Chalkidiki      | 23.775 | 40.223 | Mobile substrates |
| 119 | S Aegean      | Cretan Sea      | 24.067 | 35.550 | Mobile substrates |
| 120 | S Aegean      | Cyclades Isls   | 24.455 | 37.385 | Mobile substrates |
| 121 | N Aegean      | N Sporades Isls | 24.505 | 38.840 | Mobile substrates |
| 122 | Levantine     | Crete           | 24.551 | 35.114 | Mobile substrates |
| 123 | S Aegean      | Cyclades Isls   | 25.447 | 36.664 | Mobile substrates |
| 124 | Levantine     | Crete           | 25.572 | 34.996 | Mobile substrates |
| 125 | Levantine     | Crete           | 26.154 | 35.011 | Mobile substrates |
| 126 | S Aegean      | Cretan Sea      | 26.295 | 35.291 | Mobile substrates |
| 127 | N Aegean      | NE Aegean Isls  | 26.513 | 38.975 | Mobile substrates |
| 128 | N Aegean      | NE Aegean Isls  | 26.984 | 37.794 | Mobile substrates |
| 129 | Levantine     | Dodecanese Isls | 27.205 | 35.528 | Mobile substrates |
| 130 | Levantine     | Dodecanese Isls | 28.095 | 36.164 | Mobile substrates |
| 131 | Levantine     | Dodecanese Isls | 28.233 | 36.404 | Mobile substrates |
| 132 | Levantine     | Dodecanese Isls | 29.604 | 36.147 | Mobile substrates |
| 133 | Ionian        | Ionian Isls     | 21.558 | 37.045 | Seagrasses        |

| AA  | Marine region | Marine area     | x      | y      | Habitat type |
|-----|---------------|-----------------|--------|--------|--------------|
| 134 | Ionian        | Ionian IsIs     | 22.949 | 36.159 | Seagrasses   |
| 135 | S Aegean      | Cyclades IsIs   | 24.372 | 37.311 | Seagrasses   |
| 136 | Levantine     | Crete           | 24.412 | 35.171 | Seagrasses   |
| 137 | S Aegean      | Cyclades IsIs   | 24.530 | 36.766 | Seagrasses   |
| 138 | Levantine     | Crete           | 24.551 | 35.114 | Seagrasses   |
| 139 | Levantine     | Crete           | 26.154 | 35.011 | Seagrasses   |
| 140 | N Aegean      | NE Aegean IsIs  | 26.156 | 39.162 | Seagrasses   |
| 141 | N Aegean      | NE Aegean IsIs  | 26.513 | 38.975 | Seagrasses   |
| 142 | N Aegean      | NE Aegean IsIs  | 26.541 | 39.001 | Seagrasses   |
| 143 | S Aegean      | Dodecanese IsIs | 26.966 | 37.016 | Seagrasses   |
| 144 | N Aegean      | NE Aegean IsIs  | 27.037 | 37.732 | Seagrasses   |
| 145 | Levantine     | Dodecanese IsIs | 27.153 | 35.609 | Seagrasses   |
| 146 | Levantine     | Dodecanese IsIs | 28.233 | 36.404 | Seagrasses   |
| 147 | Levantine     | Dodecanese IsIs | 29.598 | 36.149 | Seagrasses   |
| 148 | Levantine     | Dodecanese IsIs | 29.603 | 36.148 | Seagrasses   |
| 149 | N Aegean      | Evoikos Gulf    | 23.353 | 38.505 | Water column |
| 150 | N Aegean      | Evoikos Gulf    | 23.423 | 38.503 | Water column |

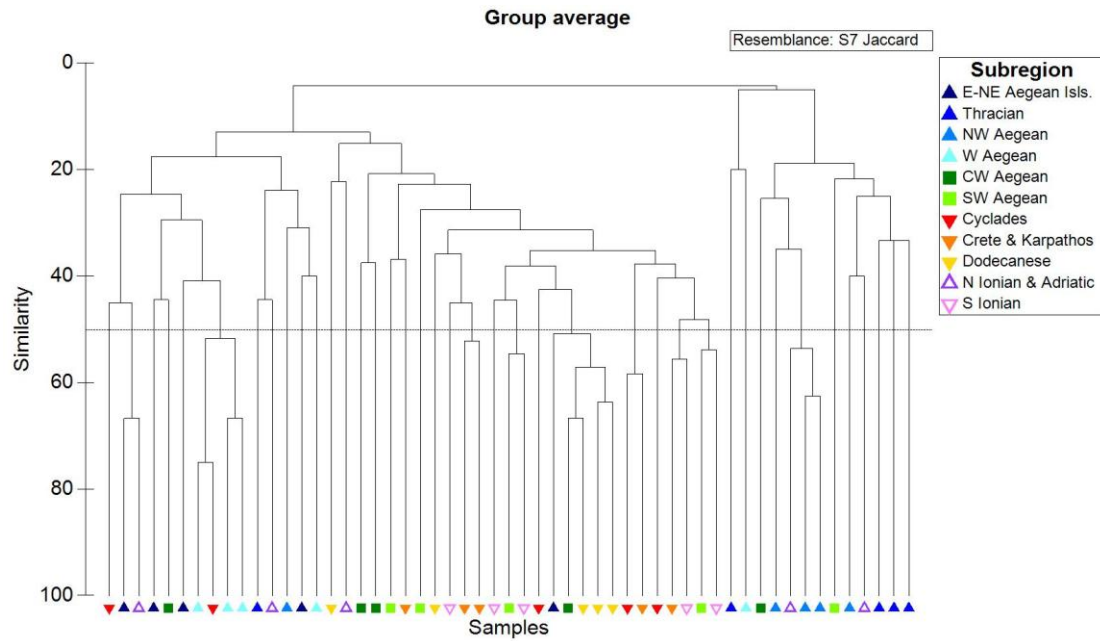

**Figure S2.** Dendrogram resulting from the Hierarchical Cluster Analysis depicting the level of similarity of distinct marine subregions in the Greek Seas based on ICAS composition. The analysis was conducted using a similarity matrix of presence/absence data based on Jaccard's coefficient, and the unweighted pair group method with arithmetic mean. The horizontal line signifies the 50% similarity level.

**Table S2.** PERMANOVA results regarding the total number of ICAS (a) and ICAS community composition (b) located within/close to and far from large ports of the Greek Seas

| (a) Number of species     |    |                 |                 |          |              |         |
|---------------------------|----|-----------------|-----------------|----------|--------------|---------|
| Source                    | df | Sums of squares | Mean of squares | Pseudo-F | permutations | p-value |
| Port                      | 6  | 1122.8          | 187.13          | 8.871    | 9947         | 0.0001  |
| Location                  | 1  | 152.38          | 152.38          | 7.2235   | 9808         | 0.012   |
| Port x Location           | 6  | 251.29          | 41.881          | 1.9853   | 9940         | 0.0965  |
| Res                       | 28 | 590.67          | 21.095          |          |              |         |
| Total                     | 41 | 2117.1          |                 |          |              |         |
| (b) Community composition |    |                 |                 |          |              |         |
| Source                    | df | Sums of squares | Mean of squares | Pseudo-F | permutations | p-value |
| Port                      | 6  | 44631           | 7438.5          | 2.1486   | 9809         | 0.0001  |
| Location                  | 1  | 6192.4          | 6192.4          | 1.7887   | 9904         | 0.04    |
| Port x Location           | 6  | 26249           | 4374.8          | 1.2637   | 9811         | 0.0696  |
| Res                       | 28 | 96937           | 3462            |          |              |         |
| Total                     | 41 | 1.74E+05        |                 |          |              |         |
